# Supplementary material for: Importance of the Aspergillus fumigatus Mismatch Repair Protein Msh6 in Antifungal Resistance Development
Source: MDPI journal article supplement (doi:10.3390/jof10030210), 2024-03-12

**Table S1.- Origin, year of isolation and geographical origin of the strains used in the NGS analysis. Mutations of the genes described in this work.**

| STRAIN               | Cyp51A | CytB | B-TUB | SDH2 | Msh6 | Country | Origin | Year | CLUSTER |
|----------------------|--------|------|-------|------|------|---------|--------|------|---------|
| ES42518              | WT     |      | WT    | WT   | --   | IT      | VET    | 2016 | I       |
| CM6616               | WT     |      | WT    | WT   | --   | SP      | CL     | 2012 |         |
| CM6458               | WT     |      | WT    | WT   | --   | SP      | CL     | 2011 |         |
| ES59287              | WT     |      | WT    | WT   | --   | IT      | VET    | 2016 |         |
| 09-7500806           | WT     |      | WT    | WT   | --   | UK      | CL     | --   |         |
| ATCC204305/2580      | WT     |      | WT    | WT   | --   | Ref     | --     | --   |         |
| IFM58029             | WT     |      | WT    | WT   | --   | JP      | CL     | --   |         |
| IFM59361             | WT     |      | WT    | WT   | --   | JP      | CL     | --   |         |
| IFM62516             | WT     |      | WT    | WT   | --   | JP      | CL     | --   |         |
| IFM55369             | WT     |      | F200Y | WT   | --   | JP      | CL     | --   |         |
| IFM59359             | WT     |      | WT    | WT   | --   | JP      | CL     | --   |         |
| IFM59777             | WT     |      | WT    | WT   | --   | JP      | CL     | --   |         |
| IFM59073             | WT     |      | WT    | WT   | --   | JP      | CL     | --   |         |
| CM5757               | WT     |      | WT    | WT   | --   | SP      | CL     | 2009 |         |
| CM5907               | WT     |      | WT    | WT   | --   | SP      | CL     | 2009 |         |
| 12-7504462           | WT     |      | WT    | WT   | --   | UK      | CL     | --   |         |
| CM7555               | WT (R) |      | WT    | WT   | --   | SP      | CL     | 2014 |         |
| SL143439             | WT     |      | WT    | WT   | --   | PG      | --     | --   |         |
| 08-19-02-30          | WT     |      | WT    | WT   | --   | NT      | ENV    | --   |         |
| CM9114               | G54R   |      | WT    | WT   | --   | SP      | CL     | 2017 |         |
| SL143437             | WT     |      | WT    | WT   | --   | PG      | CL     | --   |         |
|                      |        |      |       |      |      |         |        |      |         |
| SL143441             | WT     |      | WT    | WT   | --   | PG      | --     | --   |         |
| IFM59056             | WT     |      | WT    | WT   | --   | JP      | CL     | --   |         |
| IFM58401             | WT     |      | WT    | WT   | --   | JP      | CL     | --   |         |
| TP17                 | WT     |      | WT    | WT   | --   | SP      | CL     | 2008 |         |
| CM7510               | WT (R) |      | WT    | WT   | --   | SP      | CL     | 2014 |         |
| CBS CA10             | WT     |      | WT    | WT   | --   | Ref     | CL     | --   |         |
| akuB <sup>KU80</sup> | WT     |      | WT    | WT   | --   | Ref     | CL     | --   |         |
| SL143435             | N248K  |      | WT    | WT   | --   | PG      | --     | --   |         |
| SL143438             | N248K  |      | WT    | WT   | --   | PG      | --     | --   |         |
| SL146112             | N248K  |      | WT    | WT   | --   | PG      | --     | --   |         |
| IFM61118             | N248K  |      | WT    | WT   | --   | JP      | CL     | --   |         |
| IFM61578             | P216L  |      | WT    | WT   | --   | JP      | CL     | --   |         |
| IFM58026             | N248K  |      | WT    | WT   | --   | JP      | CL     | --   |         |
| CM3248               | N248K  |      | WT    | WT   | --   | SP      | CL     | 2005 |         |
| IFM59365             | WT     |      | WT    | WT   | --   | JP      | CL     | --   |         |
|                      |        |      |       |      |      |         |        |      | III     |
| F16134               | M220K  |      | WT    | WT   | --   | DN      | CL     | --   |         |
| ES7913               |        |      | WT    | WT   | --   | IT      | VET    | 2017 |         |
| F17764               | WT     |      | WT    | WT   | --   | CN      | CL     | --   |         |
| F12219               | G54R   |      | WT    | WT   | --   | UK      | CL     | --   |         |
| AF41                 | WT     |      | WT    | WT   | --   | UK      | CL     | --   |         |
| AF72                 | G54E   |      | WT    | WT   | --   | UK      | CL     | 2002 |         |
| F14403               | G54R   |      | WT    | WT   | --   | UK      | CL     | --   |         |
| IFM60514             | WT     |      | WT    | WT   | --   | JP      | CL     | --   |         |
| IFM61407             | WT     |      | WT    | WT   | --   | JP      | CL     | --   |         |
| IFM61610             | WT     |      | WT    | WT   | --   | JP      | CL     | --   |         |
| AF90                 | M220V  |      | WT    | WT   | --   | UK      | CL     | 1997 |         |
| SL143436             | WT     |      | WT    | WT   | --   | PG      | --     | --   |         |
| T11                  | WT     |      | WT    | WT   | --   | DN      | ENV    | 2009 |         |
| CM8900               | WT (R) |      | WT    | WT   | --   | SP      | CL     | 2017 |         |
| CM9103               | WT     |      | WT    | WT   | --   | SP      | CL     | 2017 |         |
| CM4862               | WT     |      | WT    | WT   | --   | SP      | CL     | 2007 |         |
| TP16                 | WT     |      | WT    | WT   | --   | SP      | ENV    | 2013 |         |
| CM8940               | G54A   |      | WT    | WT   | --   | SP      | CL     | 2017 |         |
| F16311               | WT     |      | WT    | WT   | --   | UK      | CL     | --   |         |
| F18085               | WT     |      | WT    | WT   | --   | UK      | CL     | --   |         |
| CM237                | WT     |      | WT    | WT   | --   | UK      | CL     | --   |         |
| CM6126               | WT     |      | WT    | WT   | --   | SP      | CL     | 2010 |         |

|             |               |       |       |       |       |     |     |      |  |
|-------------|---------------|-------|-------|-------|-------|-----|-----|------|--|
| CM6052      | WT            |       | WT    | WT    | G240A | SP  | CL  | 2010 |  |
| F17729      | WT            |       | WT    | WT    | --    | UK  | CL  | --   |  |
| F17729W     | WT            |       | WT    | WT    | --    | UK  | CL  | --   |  |
| F14946G     | WT            |       | WT    | WT    | --    | UK  | CL  | --   |  |
|             |               |       |       |       |       |     |     |      |  |
| CM7467      | WT            |       | WT    | WT    | --    | SP  | CL  | 2014 |  |
| CM2123      | WT            |       | WT    | WT    | --    | SP  | CL  | 2002 |  |
| T22         | TR34/L98H     |       | F200Y | R51G  | G240A | DM  | ENV | 2009 |  |
| TP20        | TR34/L98H     |       | F200Y | WT    | G240A | SP  | CL  | 2010 |  |
| 2762619     | TR34/L98H     |       | F200Y | WT    | G240A | SP  | CL  | 2010 |  |
| TP8         | TR34/L98H     |       | F200Y | H270R | G240A | SP  | CL  | 2013 |  |
| TP22/90812  | TR46/F121Y    | G143A | F200Y | H270Y | G240A | SP  | CL  | --   |  |
| 10-01-02-27 | TR34/L98H     | G143A | F200Y | H270Y | G240A | NT  | CL  | --   |  |
| TP9         | TR34/L98H     |       | F200Y | WT    | G240A | SP  | CL  | 2013 |  |
| CM7609      | TR34/L98H     | F129L | F200Y | WT    | G240A | SP  | CL  | 2014 |  |
| TP7         | TR34/L98H     |       | F200Y | H270R | G240A | SP  | CL  | 2013 |  |
| TP6         | TR34/L98H     |       | F200Y | H270R | G240A | SP  | CL  | 2012 |  |
| CM4599      | TR53          | G143A | F200Y | WT    | G240A | NT  | CL  | 2006 |  |
| Afu343-P-11 | TR34/L98H     |       | F200Y | WT    | G240A | IN  | CL  | --   |  |
| Afu591-12   | TR34/L98H     | G143A | F200Y | WT    | G240A | IN  | CL  | --   |  |
| Afu218-E11  | TR34/L98H     | G143A | F200Y | WT    | G240A | IN  | ENV | --   |  |
| Afu166-E11  | TR34/L98H     | G143A | F200Y | WT    | G240A | IN  | ENV | --   |  |
| Afu124-E11  | TR34/L98H     | G143A | F200Y | WT    | G240A | IN  | ENV | --   |  |
| Afu257-E11  | TR34/L98H     | G143A | F200Y | WT    | G240A | IN  | ENV | --   |  |
| Afu1042-09  | TR34/L98H     | G143A | F200Y | WT    | G240A | IN  | CL  | --   |  |
| Afu942-09   | TR34/L98H     | G143A | F200Y | WT    | G240A | IN  | CL  | --   |  |
|             |               |       |       |       |       |     |     |      |  |
| 08-36-03-25 | TR34/L98H + * |       | F200Y | WT    | G240A | NT  | CL  | --   |  |
| CM8022*     | TR34/L98H + * |       | E198Q | T298A | G240A | SP  | CL  | 2016 |  |
| M10731*     | TR34/L98H + * |       | E198Q | WT    | G240A | DN  | CL  | --   |  |
| 08-12-12-13 | TR34/L98H + * |       | F200Y | WT    | --    | NT  | CL  | --   |  |
| CM3271*     | TR34/L98H + * |       | F200Y | WT    | --    | NT  | CL  | 2004 |  |
| CM3273*     | TR34/L98H + * |       | E198Q | WT    | --    | NT  | CL  | 2004 |  |
| CM8535      | TR34/L98H     | G143A | F200Y | WT    | --    | SP  | CL  | 2016 |  |
| 08-31-08-91 | TR34/L98H     |       | F200Y | WT    | G240A | NT  | CL  | --   |  |
| ES49519     | WT            |       | WT    | WT    | G240A | IT  | VET | 2016 |  |
| CM6051      | WT            |       | WT    | WT    | --    | SP  | CL  | 2010 |  |
| CM2141      | WT            |       | WT    | WT    | G240A | SP  | CL  | 2002 |  |
| CM5419      | WT            |       | WT    | WT    | --    | SP  | CL  | 2008 |  |
| ES7601      | WT            |       | WT    | WT    | G240A | IT  | VET | 2017 |  |
| ES36254     | WT            |       | WT    | WT    | G240A | IT  | VET | 2017 |  |
| ES36359     | WT            |       | WT    | WT    | G240A | IT  | VET | 2017 |  |
| ES4649      | WT            |       | WT    | WT    | G240A | IT  | VET | 2017 |  |
|             |               |       |       |       |       |     |     |      |  |
| CM4023      | TR34/L98H     |       | WT    | WT    | G240A | NT  | CL  | 2006 |  |
| 12-7505446  | TR34/L98H     |       | WT    | WT    | G240A | UK  | CL  | --   |  |
| 08-19-02-46 | TR34/L98H     |       | WT    | WT    | G240A | NT  | ENV | --   |  |
| 08-19-02-61 | TR34/L98H     |       | WT    | WT    | G240A | NT  | ENV | --   |  |
| T18         | TR34/L98H     |       | WT    | WT    | G240A | DN  | ENV | 2009 |  |
| CM3820      | TR34/L98H     |       | WT    | WT    | G240A | NT  | CL  | 2005 |  |
| CM4594      | TR34/L98H     |       | WT    | WT    | G240A | NT  | CL  | 2004 |  |
| CM3936      | TR34/L98H     |       | WT    | WT    | G240A | NT  | CL  | 2005 |  |
| CM4050      | TR34/L98H     |       | WT    | WT    | G240A | NT  | CL  | 2006 |  |
| CM8190      | TR34/L98H     |       | WT    | WT    | G240A | SP  | CL  | 2016 |  |
| R13         | TR34/L98H     |       | WT    | WT    | G240A | DM  | ENV | 2009 |  |
| 12-7505220  | TR34/L98H     |       | WT    | WT    | G240A | UK  | CL  | --   |  |
| 08-19-02-10 | TR34/L98H     |       | WT    | WT    | G240A | NT  | EN  | --   |  |
|             |               |       |       |       |       |     |     |      |  |
| CM7496      | WT            |       | WT    | WT    | G240A | SP  | CL  | 2014 |  |
| ATCC46645   | WT            |       | WT    | WT    | --    | Ref | --  | --   |  |
| F12636      | G54E          |       | WT    | WT    | G240A | UK  | CL  | --   |  |
| ES48850     | WT            |       | WT    | WT    | G240A | IT  | VET | 2017 |  |
| ES5784      | WT            |       | WT    | WT    | G240A | IT  | VET | 2017 |  |
| CM8755      | WT            |       | WT    | WT    | G240A | SP  | CL  | 2016 |  |
| F5211G      | WT            |       | WT    | WT    | G240A | UK  | CL  | --   |  |
| CM2159      | M220K         |       | WT    | WT    | G240A | UK  | CL  | --   |  |
| Af65        | WT            |       | WT    | WT    | G240A | UK  | CL  | --   |  |

|            |              |       |       |    |       |     |     |      |     |
|------------|--------------|-------|-------|----|-------|-----|-----|------|-----|
| 12-7504652 | WT           |       | WT    | WT | G240A | UK  | CL  | --   | II  |
| 12-7505054 | WT           |       | WT    | WT | G240A | UK  | CL  | --   |     |
| CM5390     | WT           |       | WT    | WT | G240A | SP  | CL  | 2008 |     |
| F14513G    | G138C        |       | WT    | WT | G240A | UK  | CL  | --   |     |
| F13535     | G138C        |       | WT    | WT | G240A | UK  | CL  | --   |     |
| F13952     | G138C        |       | WT    | WT | G240A | UK  | CL  | --   |     |
| F12041     | G138C        |       | WT    | WT | G240A | UK  | CL  | --   |     |
| CM3277     | TR34/L98H    |       | E198A | WT | G240A | NT  | CL  | 2007 | II  |
| CM7582     | TR34/L98H    |       | E198A | WT | G240A | SP  | CL  | 2014 |     |
| F16216     | TR34/L98H    |       | WT    | WT | G240A | UK  | CL  | --   |     |
| CM3819     | TR34/L98H    | G143A | E198A | WT | G240A | NT  | CL  | 2005 |     |
| TP5        | TR34/L98H    |       | E198A | WT | G240A | SP  | CL  | 2013 |     |
| CM8714     | TR34/L98H    |       | E198A | WT | G240A | SP  | CL  | 2016 |     |
| F17582     | WT           |       | WT    | WT | G240A | UK  | CL  | --   |     |
| CM5536     | WT           |       | WT    | WT | --    | SP  | CL  | 2009 |     |
| F15390     | M220T        |       | WT    | WT | G240A | UK  | CL  | --   |     |
| F14532     | M220T        |       | WT    | WT | G240A | UK  | CL  | --   |     |
| CM5703     | WT           |       | WT    | WT | G240A | SP  | CL  | 2009 |     |
| TP3        | WT           |       | WT    | WT | --    | SP  | ENV | 2012 |     |
| F13619     | H147Y, G448S |       | WT    | WT | G240A | UK  | CL  | ---  |     |
| CM2097     | G54R         |       | WT    | WT | --    | FR  | CL  | 1997 |     |
| CM4896     | WT           |       | WT    | WT | --    | SP  | CL  | 2007 |     |
| F7763      | 5SNPs        |       | WT    | WT | --    | UK  | CL  | --   | III |
| TP12       | 5SNPs        |       | WT    | WT | --    | SP  | CL  | 2001 |     |
| CM7632     | 5SNPs        |       | WT    | WT | --    | SP  | CL  | 2015 |     |
| AF293      | 5SNPs        |       | WT    | WT | --    | Ref | CL  | --   |     |
| TP32       | 3SNPs        |       | WT    | WT | --    | SP  | CL  | 2012 | IV  |
| F15927     | 3SNPs        |       | WT    | WT | --    | CN  | CL  | --   |     |
| SL143440   | 3SNPs        |       | WT    | WT | --    | PG  | --  | --   |     |
| CM2495     | 3SNPs        |       | WT    | WT | --    | SP  | CL  | 2003 |     |
| CM2730     | 3SNPs        |       | WT    | WT | --    | SP  | CL  | 2004 |     |
| CM2733     | 3SNPs        |       | WT    | WT | --    | SP  | CL  | 2004 |     |
| CM3249     | 3SNPs        |       | WT    | WT | --    | SP  | CL  | 2005 |     |
| CM3262     | 3SNPs        |       | WT    | WT | --    | SP  | CL  | 2005 |     |
| CM3720     | 3SNPs (R)    |       | WT    | WT | --    | SP  | CL  | 2006 |     |
| CM4602     | 3SNPs        |       | WT    | WT | --    | SP  | CL  | 2006 |     |
| CM4946     | 3SNPs        |       | WT    | WT | --    | SP  | CL  | 2007 |     |
| CM7560     | 3 SNPs       |       | WT    | WT | --    | SP  | CL  | 2014 |     |
| CM7570     | 3 SNPs       |       | WT    | WT | --    | SP  | CL  | 2014 |     |

Polymorphisms in Cyp51A: 5SNPs (F46Y/M172V/N248T/D255E/E427K); 3SNPs (F46Y/M172V/D255E). TR34/L98H + \* (TR34/L98H/S297T/F495I). Spain, SP; Portugal, PG; Canada, CN; India, IN; United kingdom, UK; Denmark, DN; The Netherlands, NT; France, FR; Japan, JN; Reference, Ref.

**Table S2:** Primers for the construction of the *Δmsh6* deletion cassette.

| Primer name | Sequence (5'-3')                                             | Amplicon size |
|-------------|--------------------------------------------------------------|---------------|
| p1          | AGCTCGACTTCGATACAGAAGCCTCCAATG                               | 1300 pb       |
| p2          | GTTACCAATGGGATCCCGTAATCAATTGCCCGTTTAGTGGTGGTATCGGTATGGACACTC |               |
| p3          | GAGTGTCCATACCGATACCACCACTAAACGGGCAATTGATTACGGGATCCCATTGTAAC  | 1900 pb       |
| p5          | CATACTCCCACTAGAACCCCTTGACGAAGCAATGGCCTCTTGATCTTTGTTGTATTATA  |               |
| p4          | TATAATACAAACAAAGATGCAAGAGGCCATTGCTTCGTCGAAGGGTCTAGTGGGAGTATG | 1400pb        |
| p6          | CCTTTATCATCGTGCGCCTCCTATTTCTCC                               |               |
| p7          | CCAGTGTGCTACAGCTTACCCAAGTAAGAG                               | 4600 pb       |
| p8          | ACGCCCTCTCACTGTCACTATATCTACTGC                               |               |

**Table S3:** Primers used for sequencing of the *Δmsh6* deletion cassette.

| Primer name | Sequence (5'-3')      |
|-------------|-----------------------|
| s1          | GCATCCAGTAGACCAGTTTCC |
| s2          | GCGCACAAGCACAGGATCTC  |
| s3          | GTGTTTCGTTCCCAGTCATCG |
| s4          | CAGAAGGACGAATGCAATATC |
| s5          | CCAGTTGACGACAACACCAGC |
| s6          | CAACCACCTAGATCGACTACG |
| s7          | GTCCATCATAGTTGGTGCGC  |
| s8          | GCAACTGCAAGTTCCAAAGC  |
| s9          | CAGCGTTCTCATCTTAATGAC |
| s10         | GCTTAGCCTGTCCTTTCTTGG |
| s11         | GGAAGAACGAGAGAAGGCATG |
| s12         | GCTCTTCAATGCTACCGCTG  |

## Supplementary Figure S1

**Figure S1.** Azole susceptibility tests (E-tests) performed on the *akuB*<sup>KU80</sup> strain and the  $\Delta msh6$  *A. fumigatus* strains T3 ( $\Delta msh6$ ) and T6 ( $\Delta msh6$ )

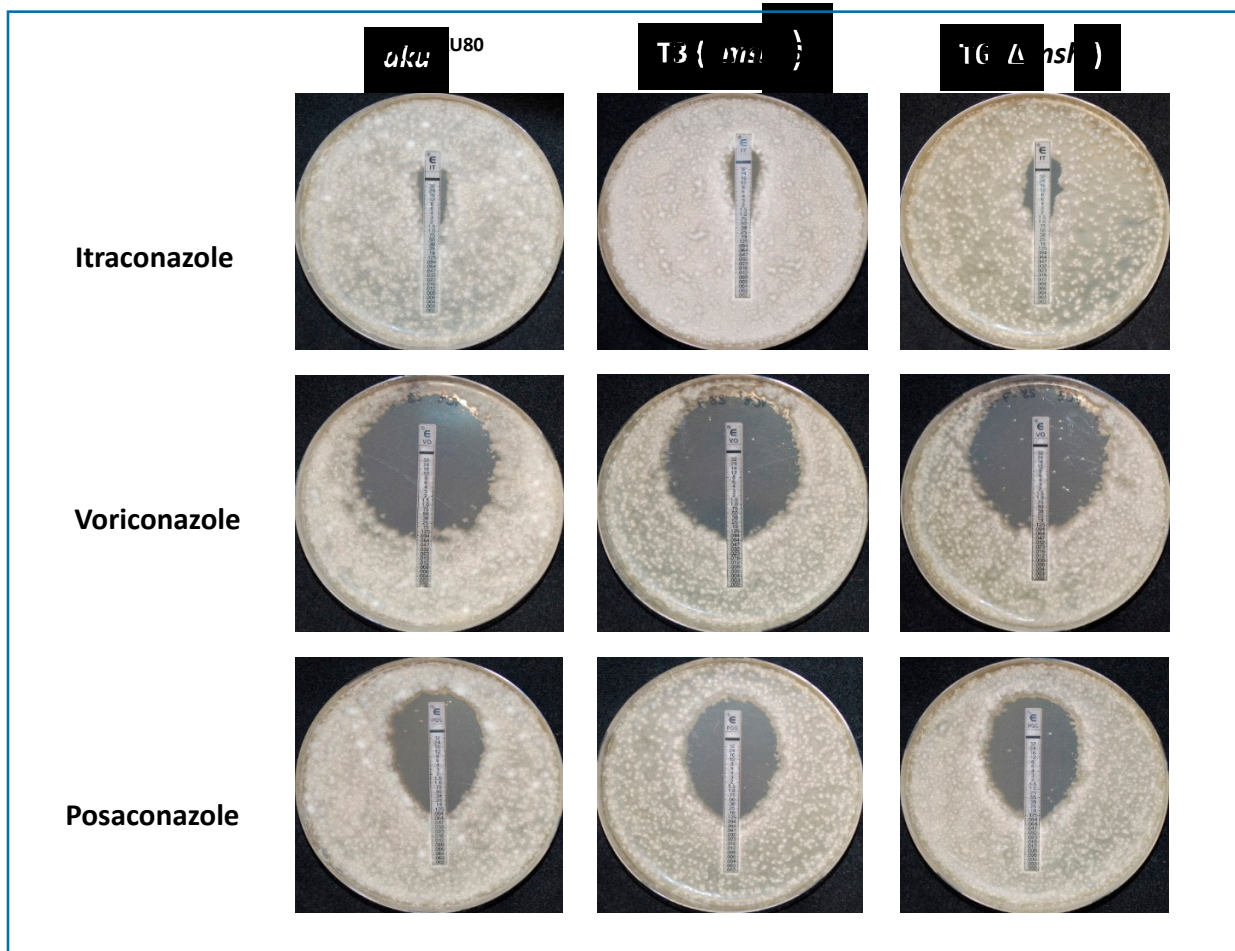

Supplement: s1 [file s1]
